# Supplementary material
Source: Springer Nature journal article supplement (https://www.springermedizin.de/resource/supplementary/13002_2008_144_MOESM1_ESM.pdf/9627264)

**Benishangul-Gumuz**

**Kurmuk**  
**Menge**  
**Asosa**

**ADDIS ABABA**

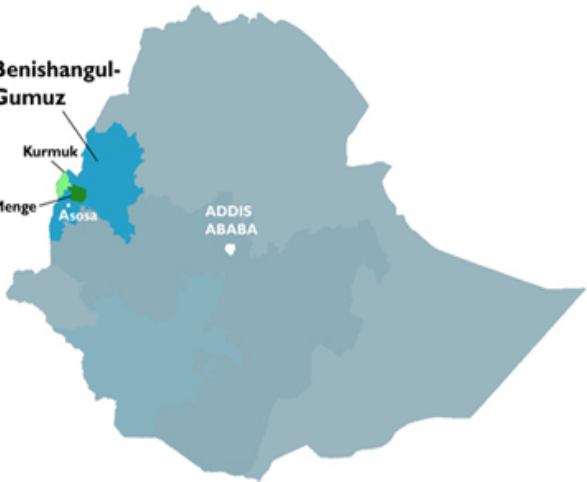

**WOREDA MAP OF ASSOSA ZONE**

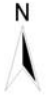

**SUDAN**

**KEMASHI ZONE**

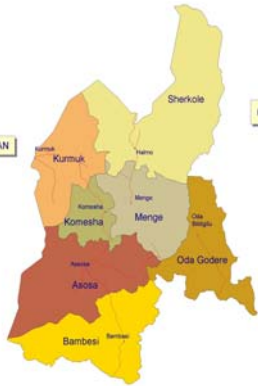

**Assosa Town**  
**Assosa road**

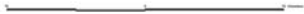

Supplement: MOESM1 [file 9627264]
